# Supplementary material for: Comprehensive Genomic Profiling of Neuroendocrine Carcinomas of the Gastrointestinal System
Source: PubMed Central journal article supplement — Cancer Discov. 2022 Mar 8;12(3):692–711. doi: 10.1158/2159-8290.CD-21-0669 (PMC9394397; doi:10.1158/2159-8290.cd-21-0669), 2022-03-08
Supplement: cd-21-0669_supps1.pdf [file cd-21-0669_supps1.pdf]

## Supplementary Figure S1. Histologic features of neuroendocrine neoplasms of the digestive system.

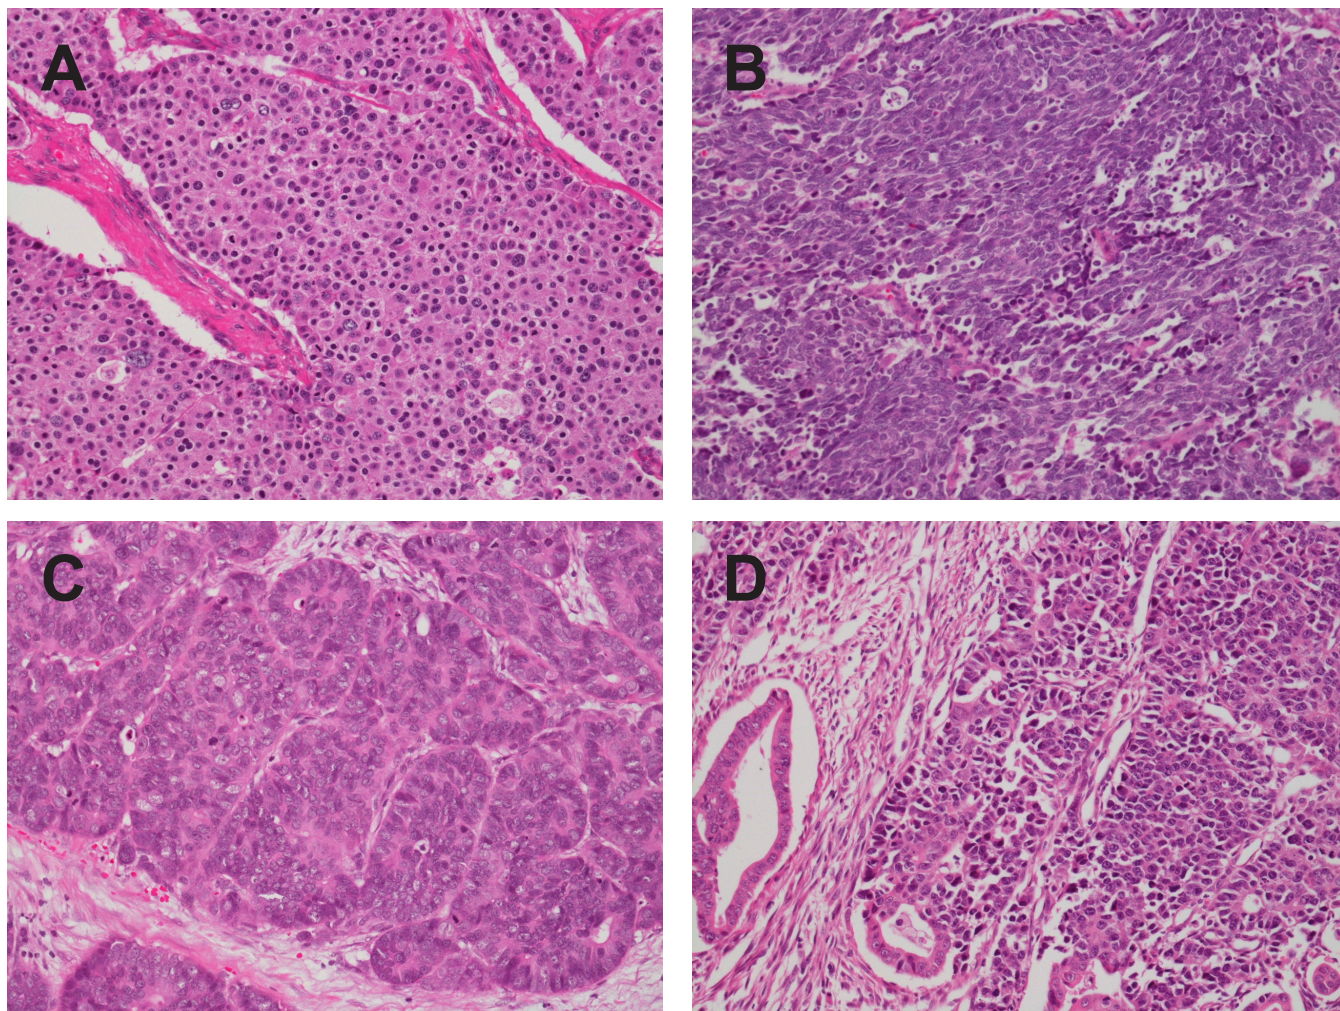

**A**, Neuroendocrine tumor of the pancreas (G3) (NE109) characterized by nests of well differentiated neuroendocrine cells with round nuclei with some pleomorphism and abundant cytoplasm. Mitoses are common. **B**, Neuroendocrine carcinoma of the pancreas (small-cell type) (NE070) showing diffuse growth of poorly differentiated neuroendocrine cells with highly atypical hyperchromatic nuclei and scant cytoplasm. **C**, Neuroendocrine carcinoma of the pancreas (large-cell type) (NE110) featuring irregular nests of poorly differentiated neuroendocrine cells with modest cytoplasm and enlarged and irregularly shaped nuclei containing prominent nucleoli. Note numerous mitoses. **D**, Mixed neuroendocrine-non-neuroendocrine neoplasm (MiNEN) of the extrahepatic bile duct (NE092). Note nests of poorly differentiated neuroendocrine cells (large cell type) connecting with gland-forming adenocarcinoma elements.
