# Supplementary material for: Comprehensive Genomic Profiling of Neuroendocrine Carcinomas of the Gastrointestinal System
Source: PubMed Central journal article supplement — Cancer Discov. 2022 Mar 8;12(3):692–711. doi: 10.1158/2159-8290.CD-21-0669 (PMC9394397; doi:10.1158/2159-8290.cd-21-0669), 2022-03-08
Supplement: cd-21-0669_supps2.pdf [file cd-21-0669_supps2.pdf]

## Supplementary Figure S2. Genomic analysis in GIS-NENs.

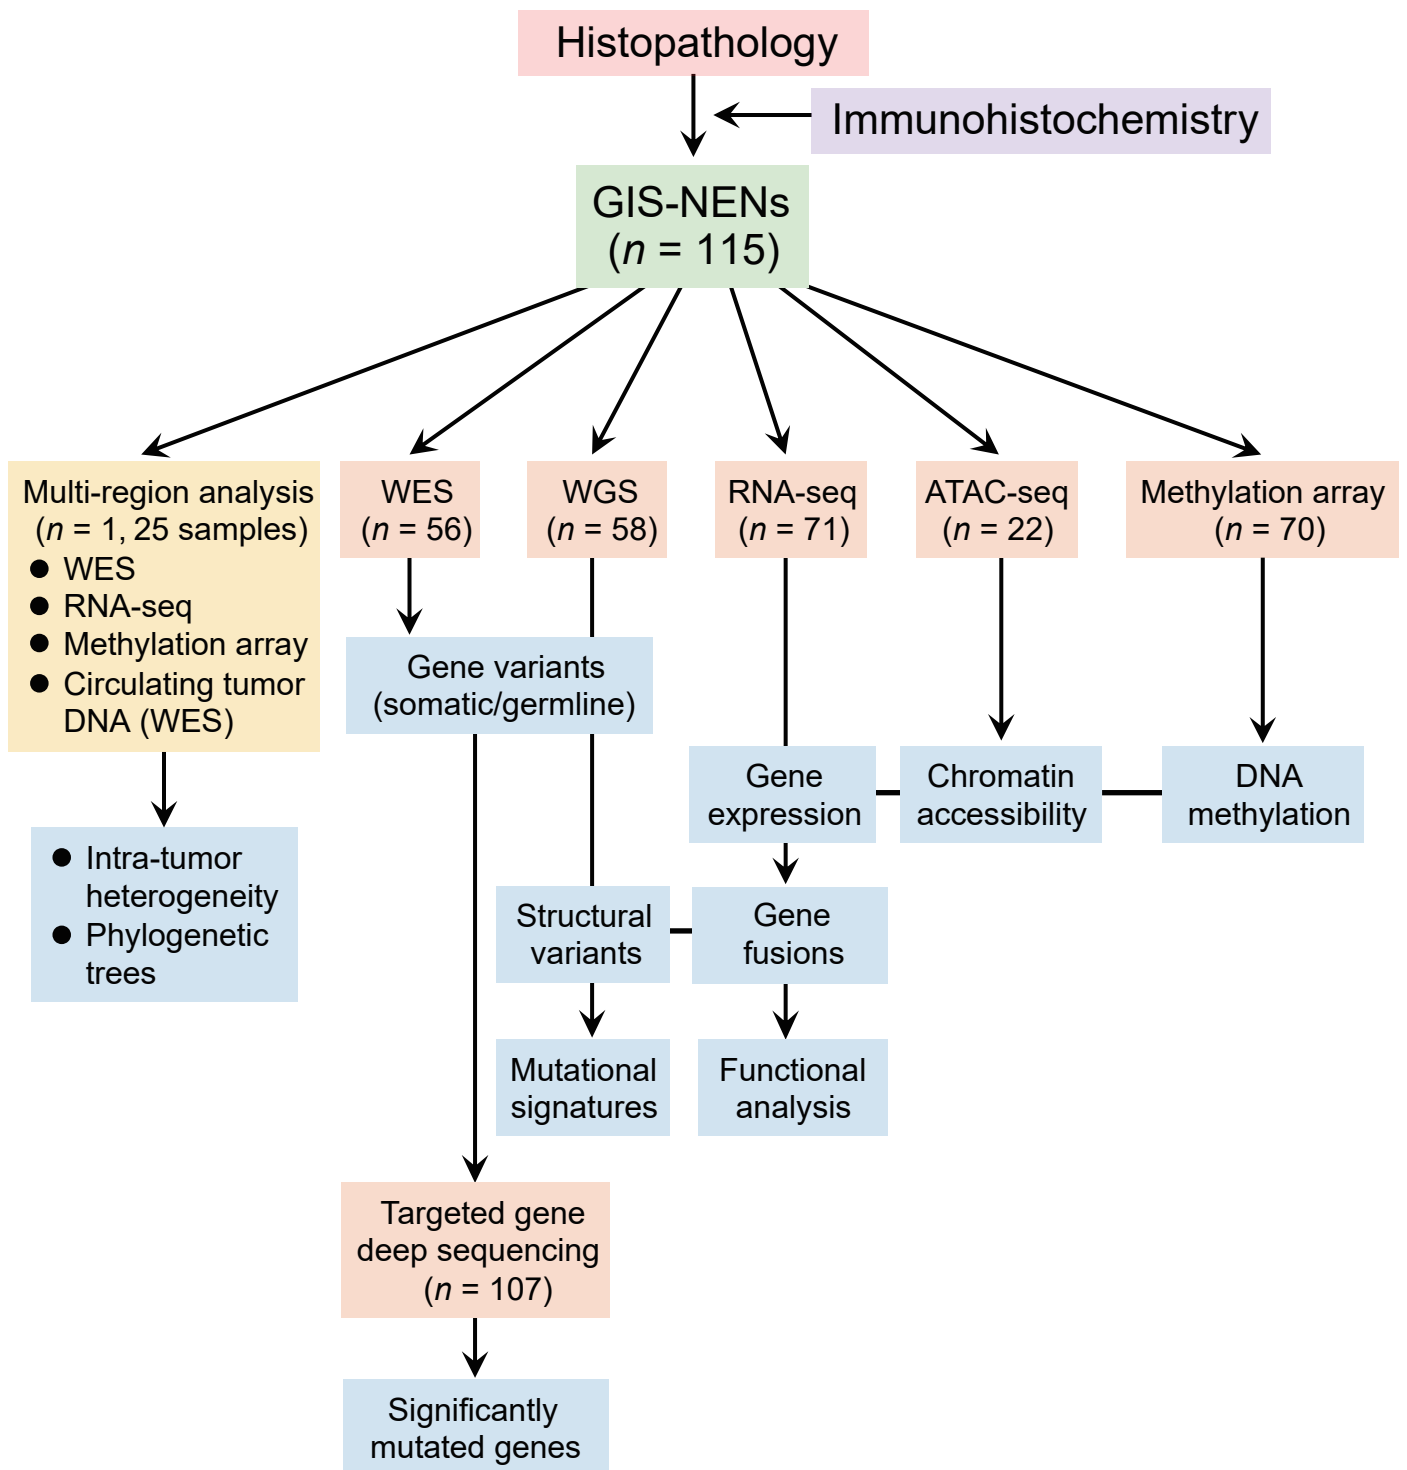

Schematic detail of the genomic study and number of samples as well as various steps of analyses of GIS-NENs.
