# Supplementary material for: Comprehensive Genomic Profiling of Neuroendocrine Carcinomas of the Gastrointestinal System
Source: PubMed Central journal article supplement — Cancer Discov. 2022 Mar 8;12(3):692–711. doi: 10.1158/2159-8290.CD-21-0669 (PMC9394397; doi:10.1158/2159-8290.cd-21-0669), 2022-03-08
Supplement: cd-21-0669_supps3.pdf [file cd-21-0669_supps3.pdf]

## Supplementary Figure S3. Relationships between clinicopathological features and 5-year disease-specific survival rates.

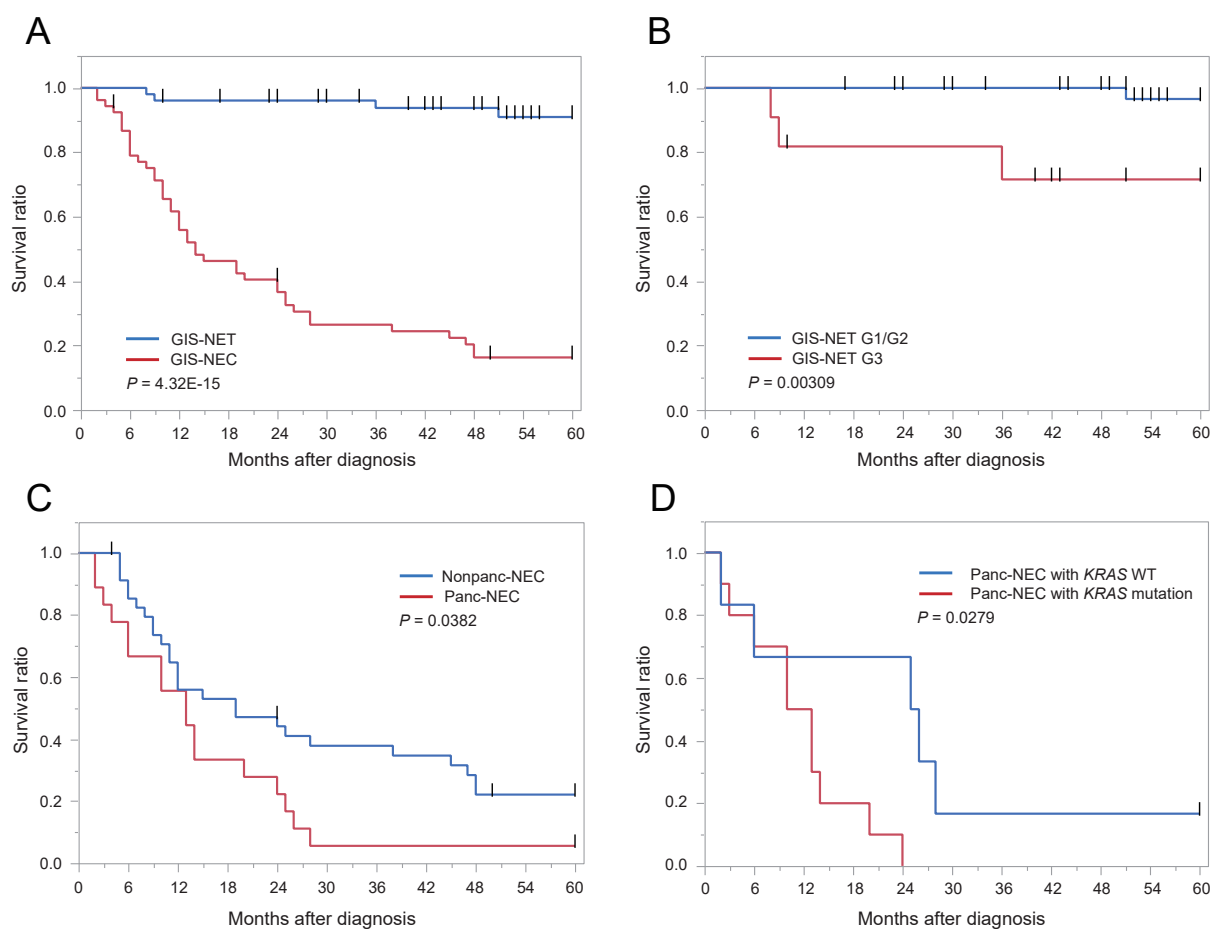

Kaplan-Meier curves and log-rank tests for patients with GIS-NET versus GIS-NEC (**A**), GIS-NETG1/G2 versus GIS-NETG3 (**B**), Nonpanc-NEC versus Panc-NEC (**C**), Panc-NEC with *KRAS* mutation versus Panc-NEC with *KRAS* wild-type (WT) (**D**).
