# Supplementary material for: Comprehensive Genomic Profiling of Neuroendocrine Carcinomas of the Gastrointestinal System
Source: PubMed Central journal article supplement — Cancer Discov. 2022 Mar 8;12(3):692–711. doi: 10.1158/2159-8290.CD-21-0669 (PMC9394397; doi:10.1158/2159-8290.cd-21-0669), 2022-03-08
Supplement: cd-21-0669_supps4.pdf [file cd-21-0669_supps4.pdf]

# Supplementary Figure S4. Oncoplot summary of mutated genes in GIS-NENs based on targeted deep sequence analysis.

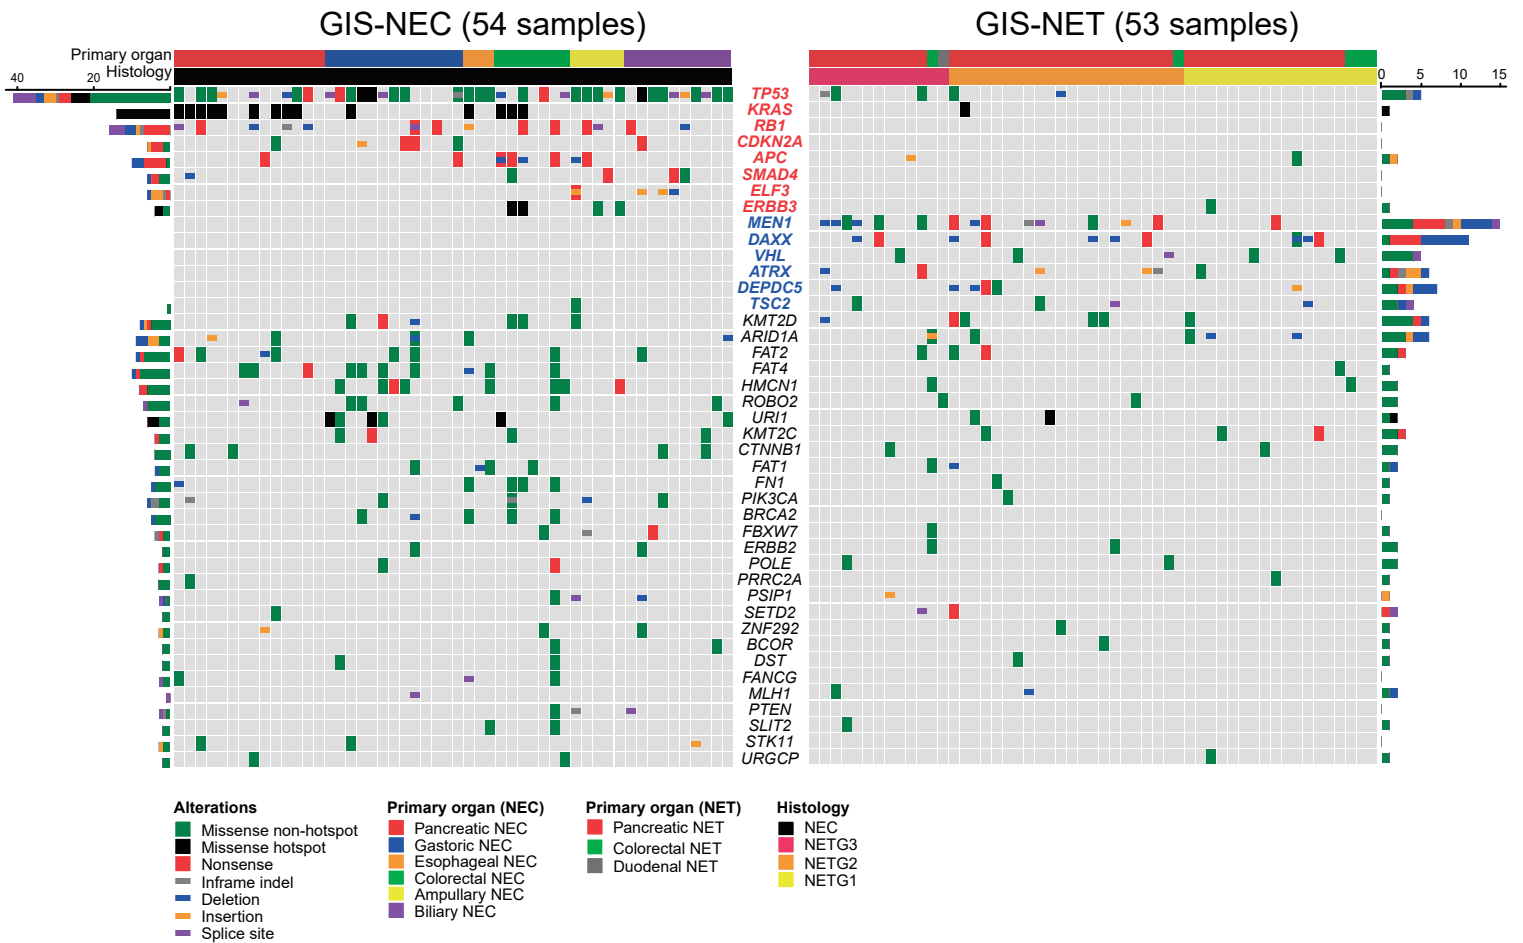

The left and right oncoplots show mutations in 54 GIS-NECs and 53 GIS-NETs, respectively. The primary organ and histology based on WHO Classification 2019 are indicated at the top. The left and right bar plots indicate the mutation counts for each individual gene in the 54 GIS-NECs and 53 GIS-NETs, respectively. The names written in red and blue indicate frequent genes ( $P < 0.05$ ) (Supplementary Tables S9 and S10) in GIS-NECs and GIS-NETs, respectively.
