# Supplementary material for: Comprehensive Genomic Profiling of Neuroendocrine Carcinomas of the Gastrointestinal System
Source: PubMed Central journal article supplement — Cancer Discov. 2022 Mar 8;12(3):692–711. doi: 10.1158/2159-8290.CD-21-0669 (PMC9394397; doi:10.1158/2159-8290.cd-21-0669), 2022-03-08
Supplement: cd-21-0669_supps5.pdf [file cd-21-0669_supps5.pdf]

# Supplementary Figure S5. Summary of SVs in GIS-NENs.

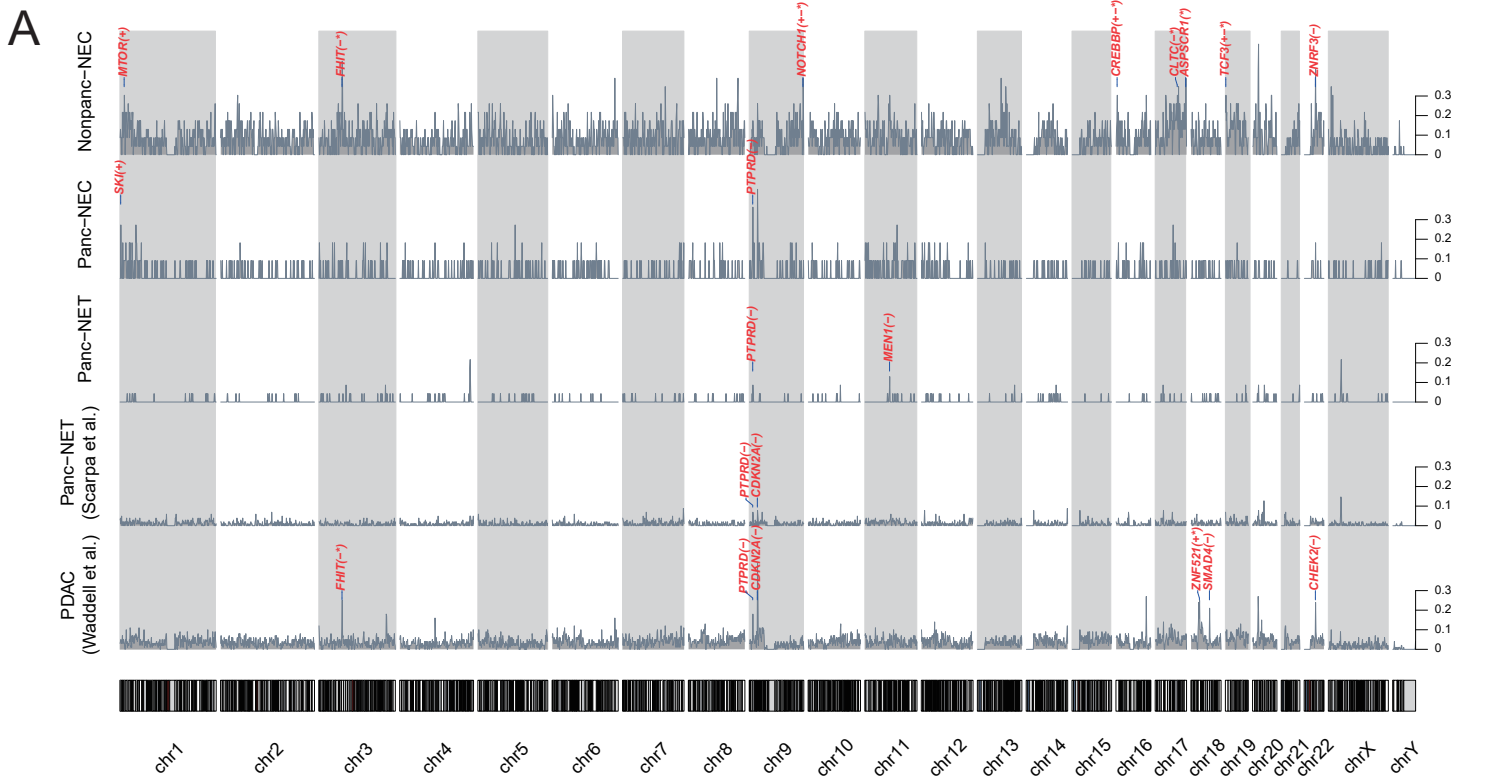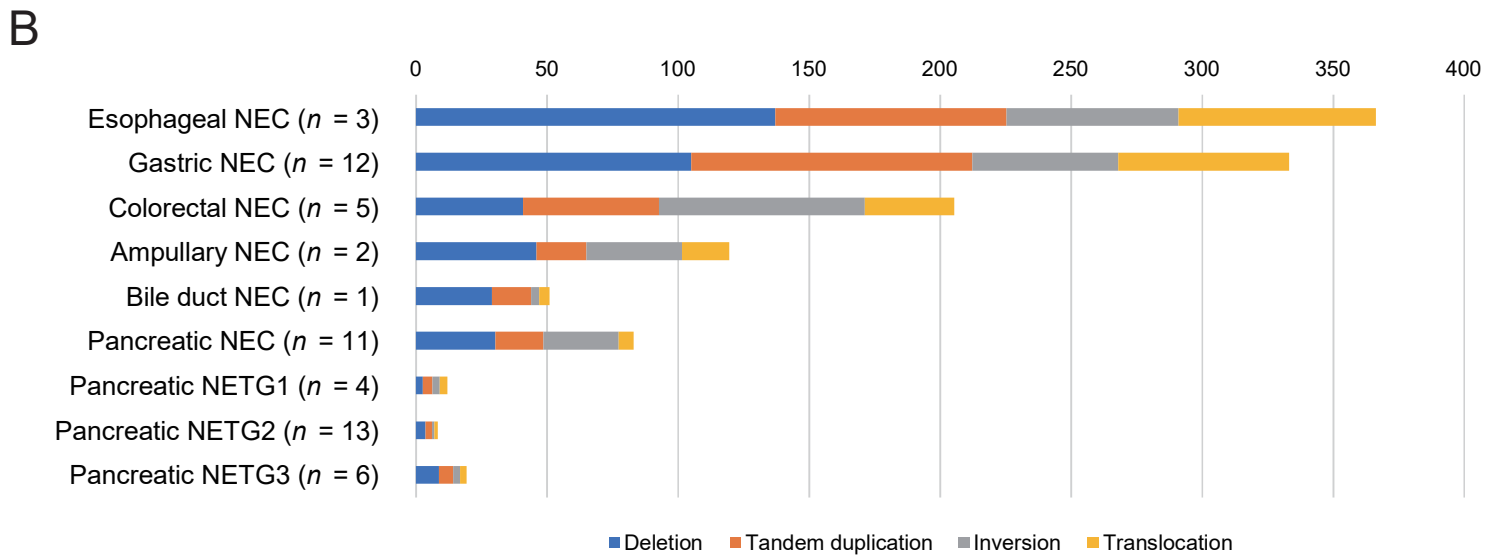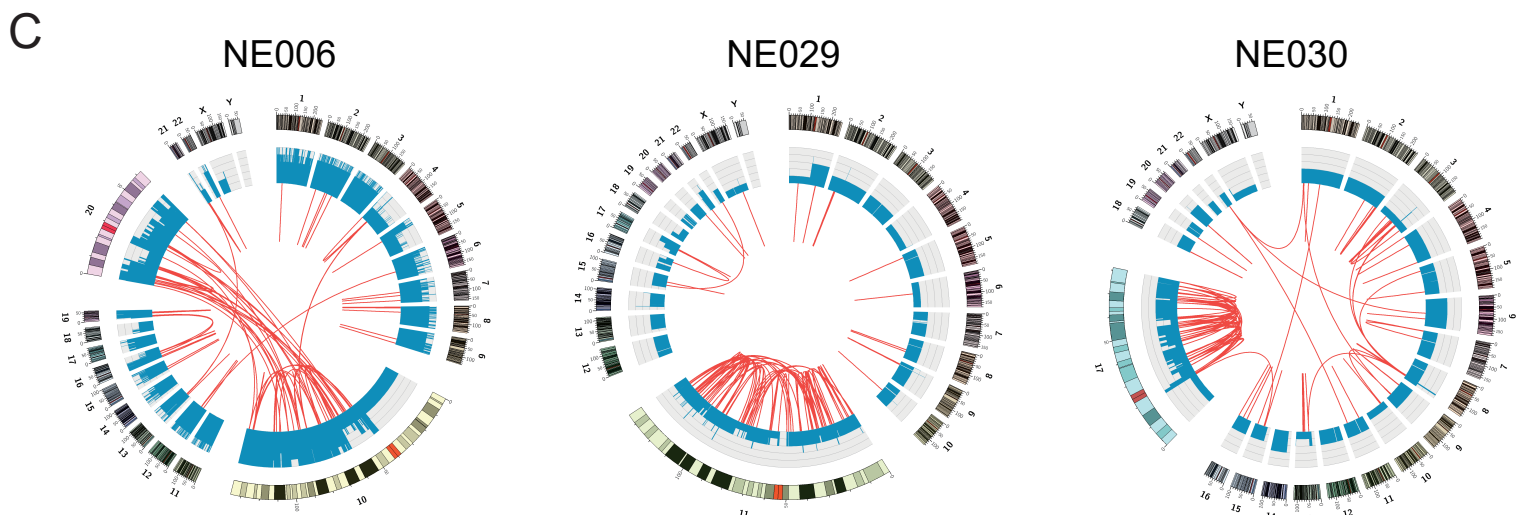

**A**, SV frequencies by counting breakpoints of SVs within 1Mb windows genome-wide on scaled chromosomes in Nonpanc-NECs ( $n = 23$ ), Panc-NECs ( $n = 11$ ), Panc-NETs ( $n = 23$ ), pancreatic neuroendocrine tumors diagnosed following the WHO classification 2010 ( $n = 102$ ) as reported by Scarpa et al. (5) and pancreatic ductal adenocarcinomas (PDAC,  $n = 100$ ) as reported by Waddell et al. (9) The genes are annotated according to the COSMIC Cancer Gene Census, using the symbols '+', '-', and '\*' indicate oncogene, tumor suppressor gene, and fusion gene, respectively. **B**, Bar chart of average numbers and types of SV calls in NECs by organ site and type of Panc-NET. **C**, Representative circos plots of chromothripsis are shown. Recurrent chromothripsis events for chromosome 11 were detected in four GIS-NECs (Supplementary Table S15).
