# Supplementary material for: Comprehensive Genomic Profiling of Neuroendocrine Carcinomas of the Gastrointestinal System
Source: PubMed Central journal article supplement — Cancer Discov. 2022 Mar 8;12(3):692–711. doi: 10.1158/2159-8290.CD-21-0669 (PMC9394397; doi:10.1158/2159-8290.cd-21-0669), 2022-03-08
Supplement: cd-21-0669_supps6.pdf [file cd-21-0669_supps6.pdf]

**Supplementary Figure S6. H&E staining and immunohistochemical staining for synaptophysin in gastric organoids with genetic engineering of *TP53* knock-out.**

Gastric organoids with genetic engineering of *TP53* KO

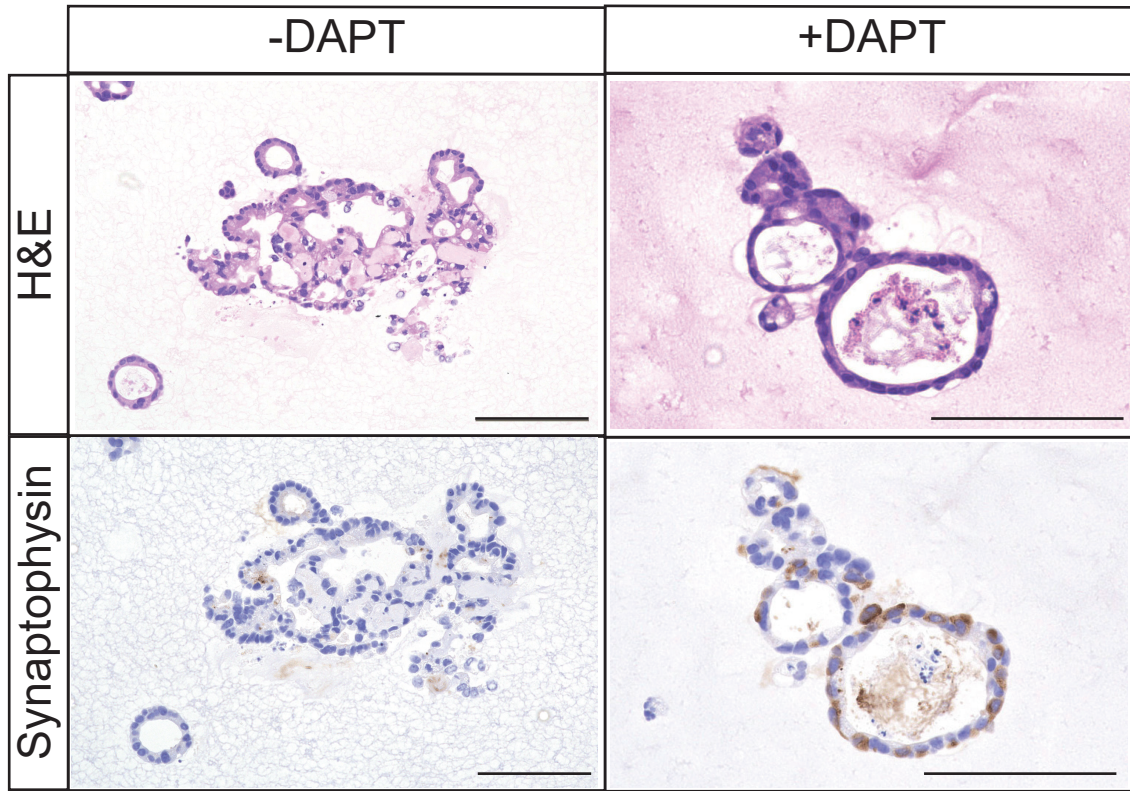

Note increase in synaptophysin expression with the Notch inhibitor, DAPT, in gastric organoids with engineering of *TP53* knock-out (KO). Scale bar, 100  $\mu$ M.
