# Supplementary material for: Comprehensive Genomic Profiling of Neuroendocrine Carcinomas of the Gastrointestinal System
Source: PubMed Central journal article supplement — Cancer Discov. 2022 Mar 8;12(3):692–711. doi: 10.1158/2159-8290.CD-21-0669 (PMC9394397; doi:10.1158/2159-8290.cd-21-0669), 2022-03-08
Supplement: cd-21-0669_supps7.pdf [file cd-21-0669_supps7.pdf]

# Supplementary Figure S7. Genomic landscape based on the morphological subclassification of GIS-NECs.

**A**

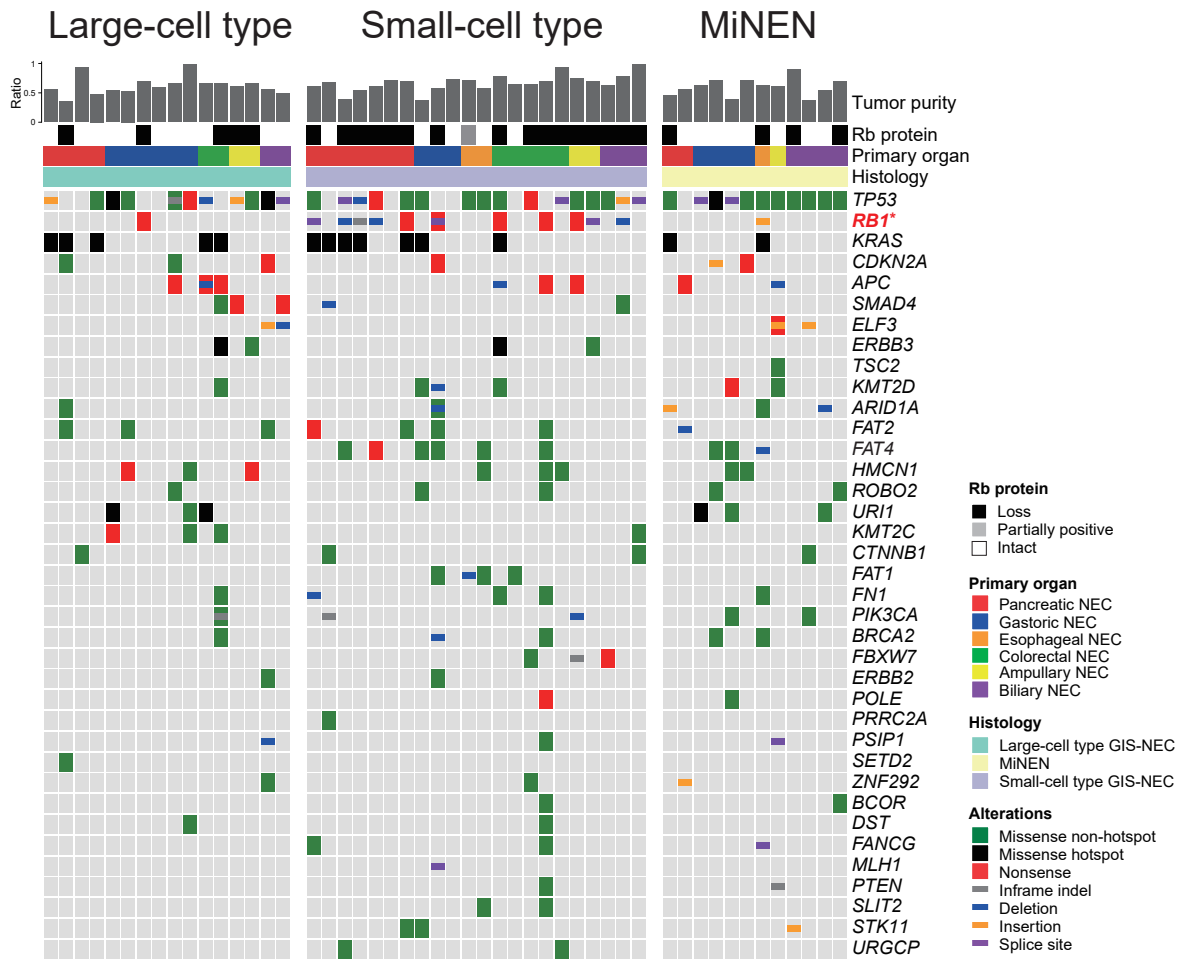

**B**

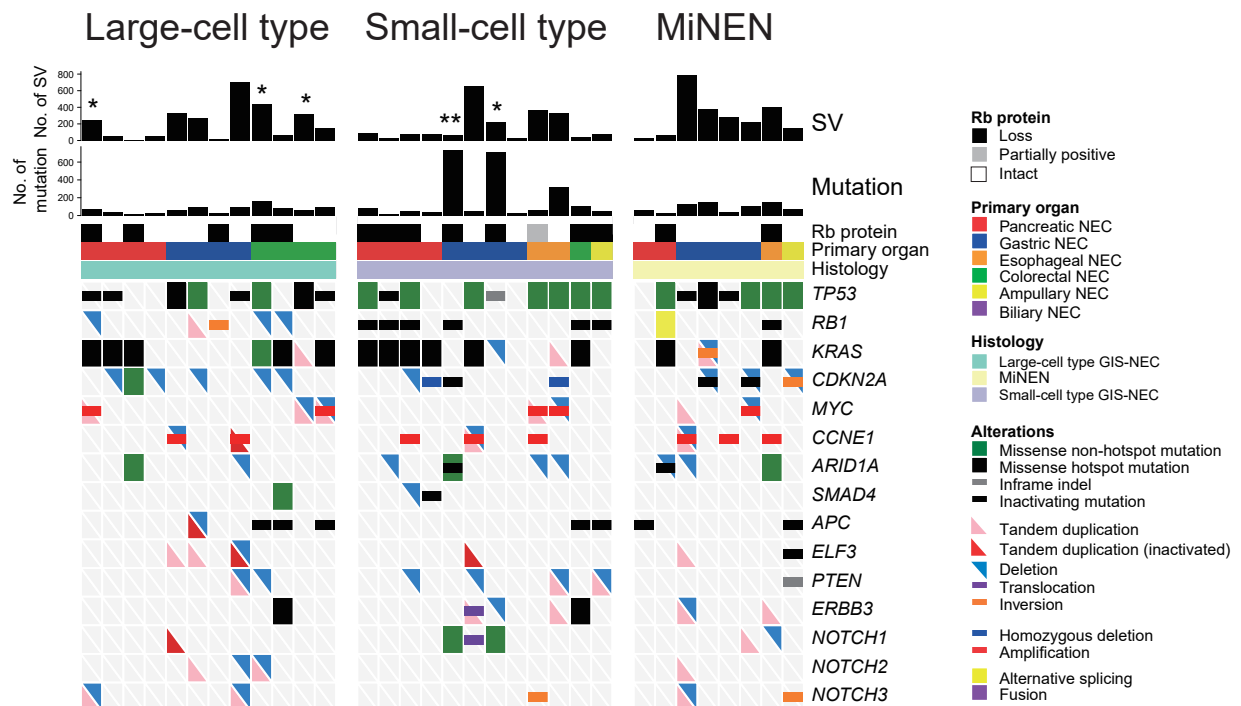

**A**, Oncoplot summary of mutated genes in large-cell type GIS-NECs, small-cell type GIS-NECs, and MiNEN based on targeted deep sequence analysis. The tumor purity, the status of Rb protein, and the primary organ are indicated at the top. **B**, Oncoplot summary of altered genes in large-cell type GIS-NECs, small-cell type GIS-NECs, and MiNEN based on WGS data. Data for SV and mutations, the Rb protein status, and the primary organ are provided at the top. *Asterisk*, organoid sample; *Double Asterisk*, hypermutator phenotype with somatic mutations of *MLH1* and *POLH* genes.
