# Supplementary material for: Comprehensive Genomic Profiling of Neuroendocrine Carcinomas of the Gastrointestinal System
Source: PubMed Central journal article supplement — Cancer Discov. 2022 Mar 8;12(3):692–711. doi: 10.1158/2159-8290.CD-21-0669 (PMC9394397; doi:10.1158/2159-8290.cd-21-0669), 2022-03-08
Supplement: cd-21-0669_supps9.pdf [file cd-21-0669_supps9.pdf]

# Supplementary Figure S9. Integration analysis of RNA-seq data and DNA methylation assay findings for GIS-NENs.

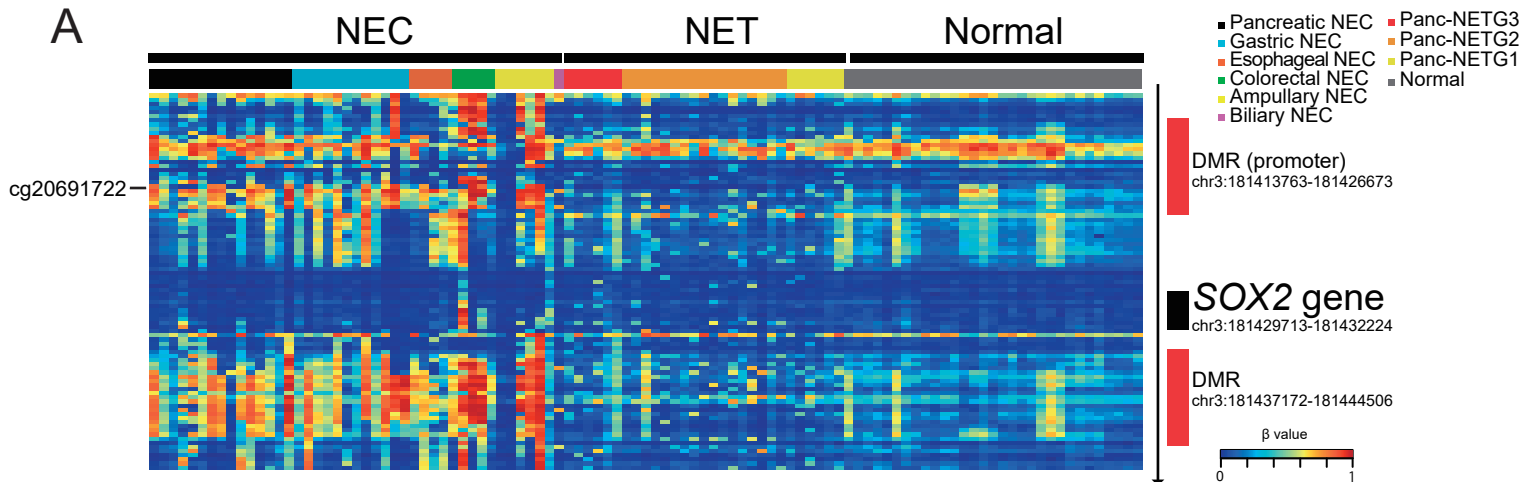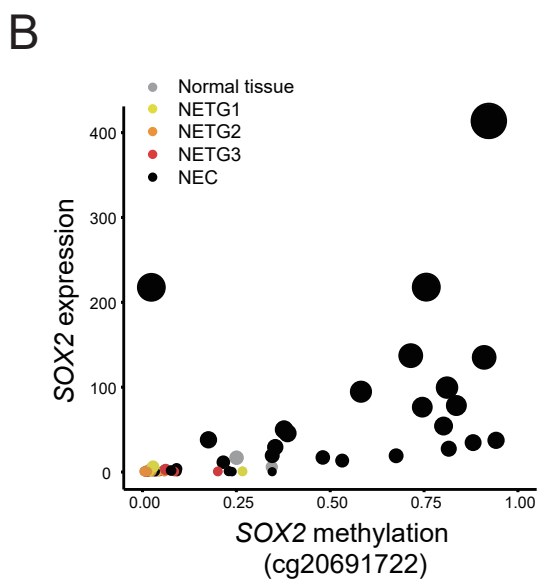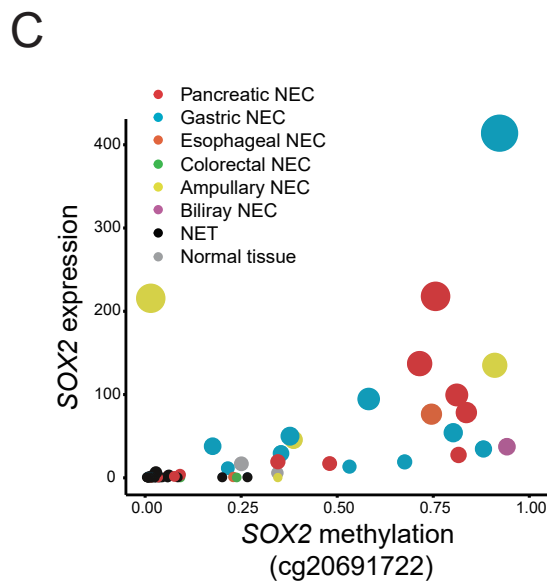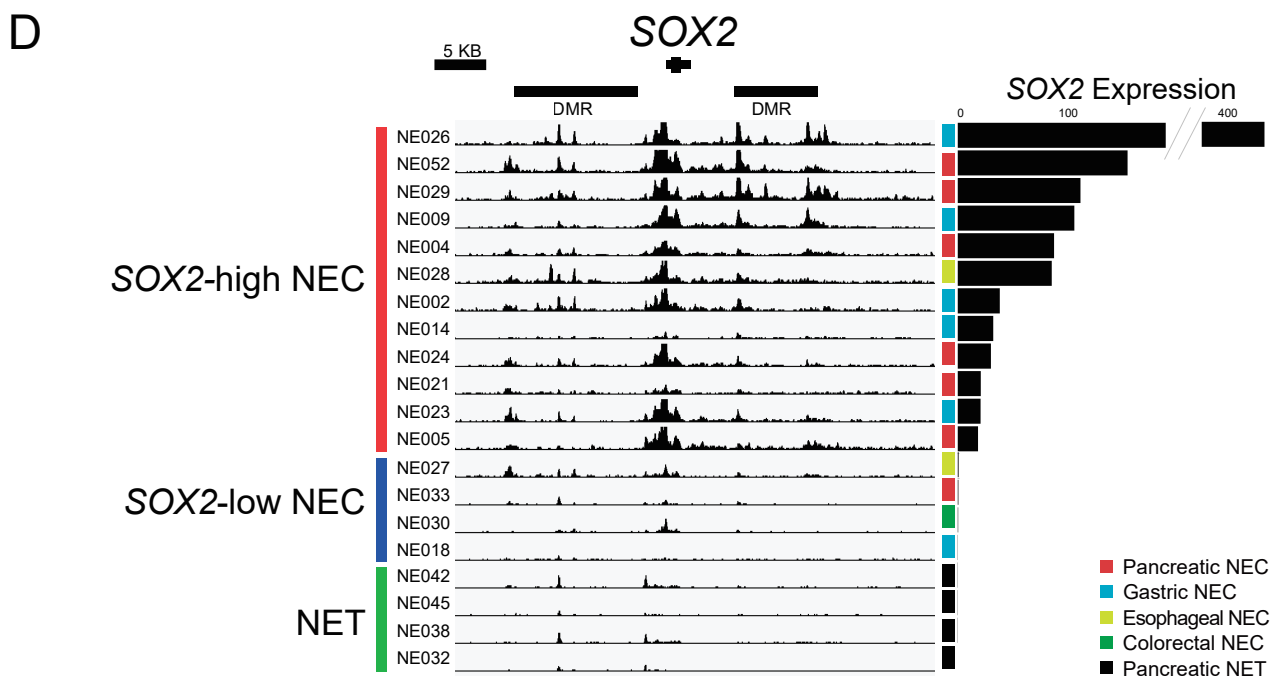

**A**, Methylation status of the genomic locus around the *SOX2* gene in GIS-NENs. **B and C**, The relationships between *SOX2* gene expression and *SOX2* methylation status are shown according to the histology for GIS-NENs (NEC, NETG1, NETG2, NETG3 and Normal tissue) and to the primary organ for GIS-NECs (Spearman rank correlation,  $\rho = 0.620$ ,  $P = 2.40 \times 10^{-8}$ ). **D**, ATAC-seq was performed for seven Panc-NECs, nine Nonpanc-NECs, and four Panc-NETs. The cases are arranged in descending order of *SOX2* expression. ATAC-seq open chromatin peaks are clear in the region surrounding the *SOX2* gene in cases with high expression. The right bar chart shows the level of *SOX2* gene expression. DMR, differentially methylated region.
