# Supplementary material for: Comprehensive Genomic Profiling of Neuroendocrine Carcinomas of the Gastrointestinal System
Source: PubMed Central journal article supplement — Cancer Discov. 2022 Mar 8;12(3):692–711. doi: 10.1158/2159-8290.CD-21-0669 (PMC9394397; doi:10.1158/2159-8290.cd-21-0669), 2022-03-08
Supplement: cd-21-0669_supps10.pdf [file cd-21-0669_supps10.pdf]

# Supplementary Figure S10. *NET1-AKR1C3* and *NET1-AKR1C4* fusion genes.

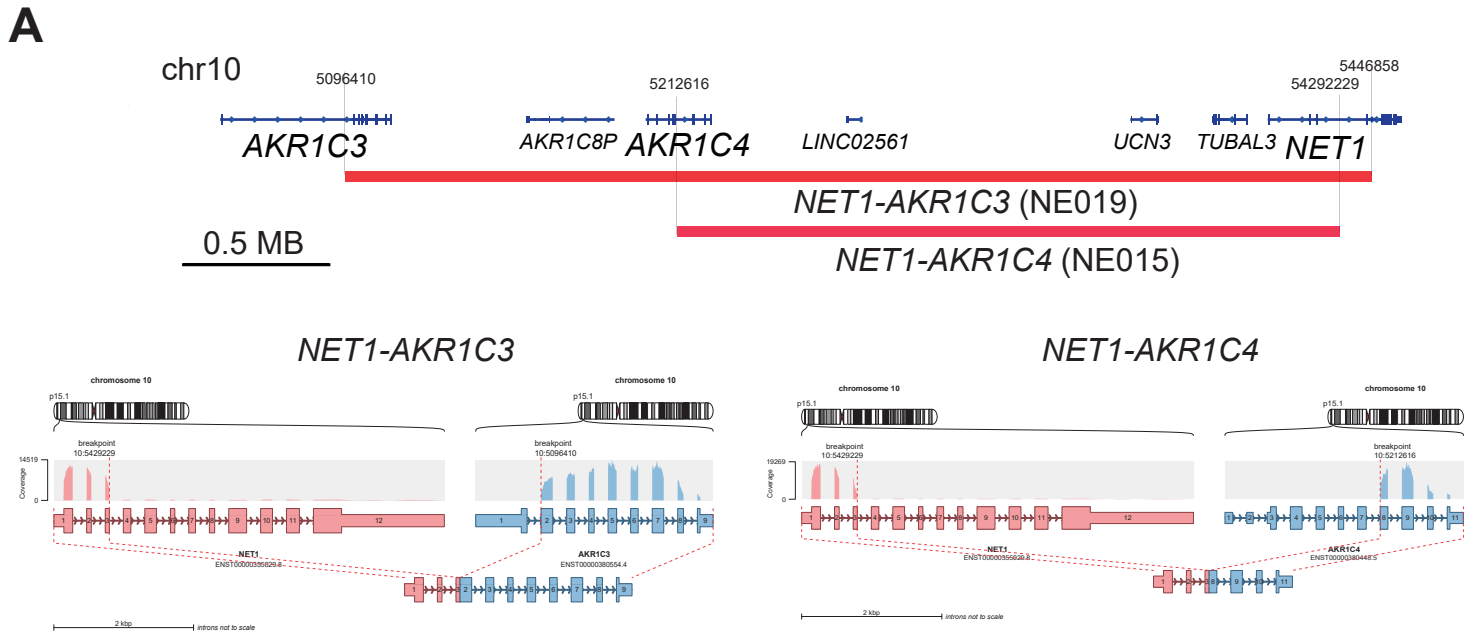

**B**

| Fusion protein     | Ingenuity canonical pathways                 | <i>P</i> -value |
|--------------------|----------------------------------------------|-----------------|
| <i>NET1-AKR1C3</i> | 1 Mitotic G1-G1/S phases                     | 1.30E-03        |
|                    | 2 E2F transcription factor network           | 2.03E-03        |
|                    | 3 RhoA activity regulation                   | 2.29E-03        |
|                    | 4 Cell cycle checkpoints                     | 3.02E-03        |
|                    | 5 Cell cycle                                 | 3.64E-03        |
| <i>NET1-AKR1C4</i> | 1 E2F-mediated regulation of DNA replication | 3.03E-04        |
|                    | 2 CTCF pathway                               | 1.36E-03        |
|                    | 3 DNA replication                            | 1.50E-03        |
|                    | 4 AP-1 transcription factor network          | 1.72E-03        |
|                    | 5 Cell cycle                                 | 1.73E-03        |

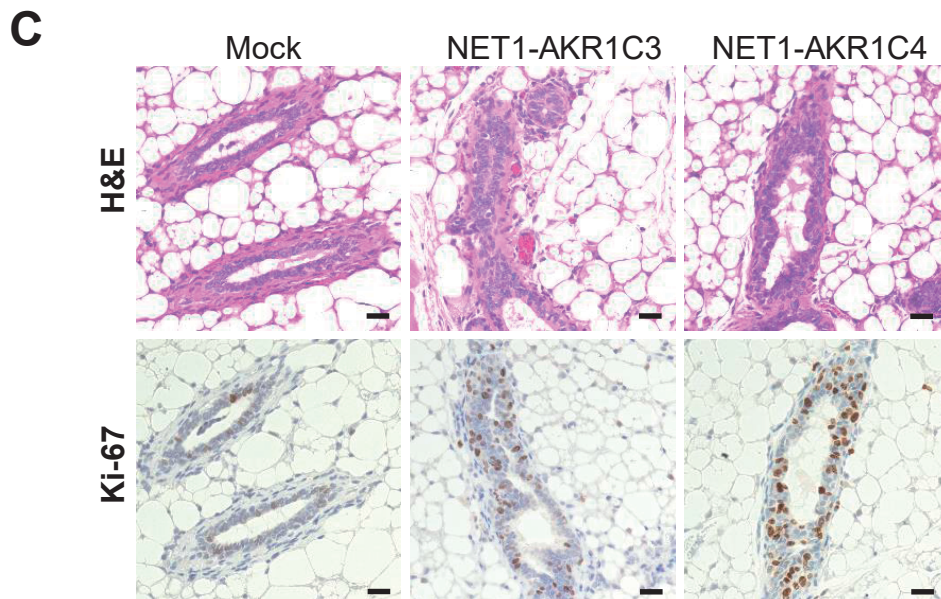

**D**

| Fusion protein     | Ki-67 index |
|--------------------|-------------|
| Mock               | 17.0 %      |
| <i>NET1-AKR1C3</i> | 24.1 %      |
| <i>NET1-AKR1C4</i> | 37.8 %      |

**A**, Top: genomic alteration of *NET1-AKR1C3/AKR1C4* loci in samples with *NET1-AKR1C3* and *NET1-AKR1C4* fusion genes detected by WGS. Red lines indicate tandem duplication in each sample. Bottom: schematic representation and raw reads of *NET1* and *AKR1C3/AKR1C4* chimera transcripts detected by RNA-sequencing. **B**, Top five enriched canonical pathways in *NET1-AKR* fusion protein-expressing cells compared with mock transfected cells. **C**, Representative images of tissue sections with H&E staining and Ki-67 immunostaining from nude mice implanted with *NET1-AKR* fusion protein-expressing and mock transfected cells 60 days after subcutaneous implant ( $1 \times 10^7$  cells/mouse). Scale bars, 50  $\mu\text{m}$ . **D**, Ki-67 indices obtained from C.
