# Supplementary material for: Comprehensive Genomic Profiling of Neuroendocrine Carcinomas of the Gastrointestinal System
Source: PubMed Central journal article supplement — Cancer Discov. 2022 Mar 8;12(3):692–711. doi: 10.1158/2159-8290.CD-21-0669 (PMC9394397; doi:10.1158/2159-8290.cd-21-0669), 2022-03-08
Supplement: cd-21-0669_supps11.pdf [file cd-21-0669_supps11.pdf]

# Supplementary Figure S11. Gastric NEC with the Merkel cell polyomavirus (MCPyV).

A

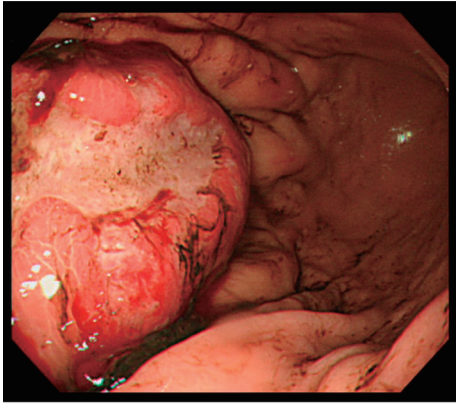

B

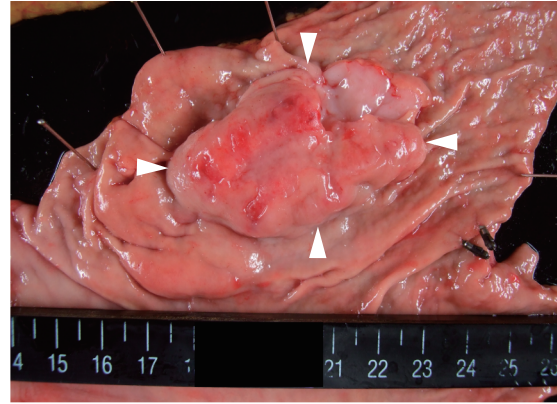

C

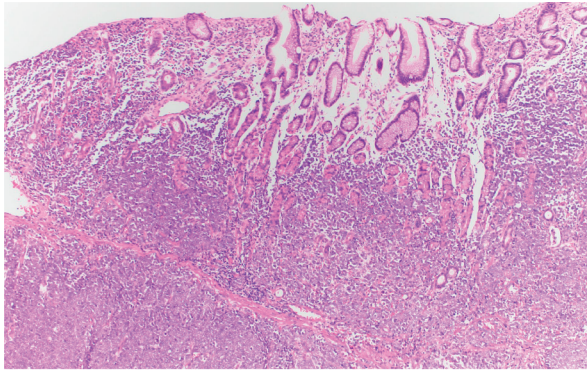

D

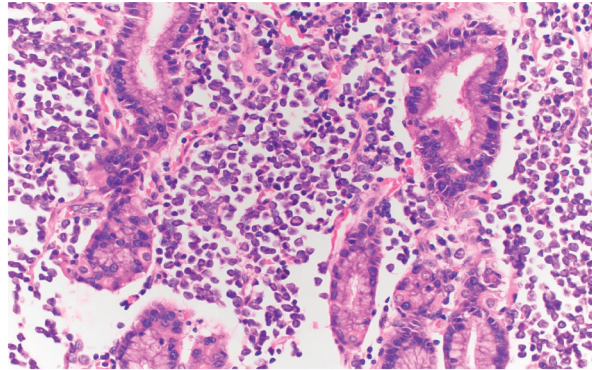

E

Synaptophysin

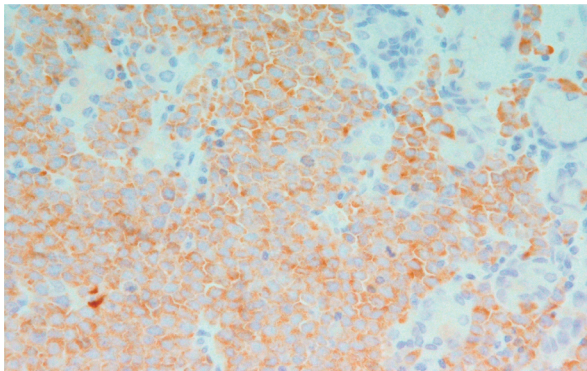

F

CK20

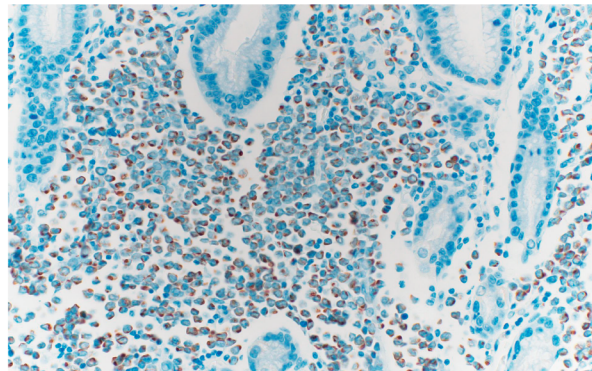

G

MCPyV (Large T antigen)

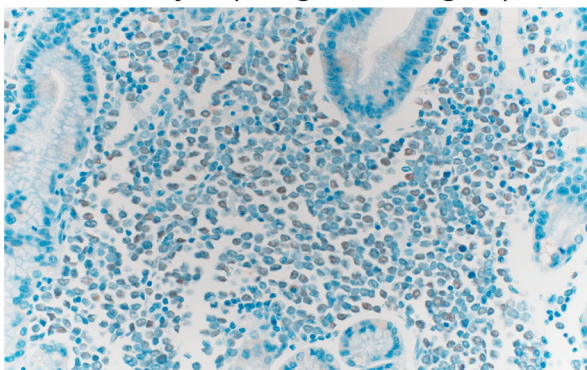

H

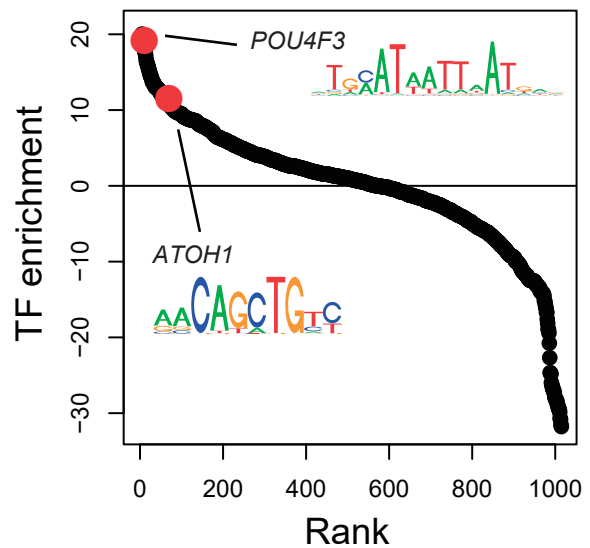

**A**, Upper gastrointestinal endoscopic image showing a large ulcerative mass in the gastric antrum. **B**, Resected specimen of a protruding tumor featuring an ulcerative lesion (Borrmann type II) in the gastric antrum (arrowheads). **C** and **D**, H&E staining shows sheets of monomorphic small cells with round nuclei, pronounced nuclear membranes and finely dispersed chromatin. **E-G**, Tumor cells are strongly positive for synaptophysin and exhibit characteristic paranuclear dot immunoreactivity for cytokeratin 20 (CK20), and nuclear immunoreactivity for the anti-MCPyV antibody (Large T antigen). **H**, Motif enrichment analysis of transcription factors (TFs) in open chromatin regions based on ATAC-seq data revealed enrichment of *POU4F3* and *ATOH1*. The motifs were ranked based on the deviationScores calculated by ChromVAR.
