# Supplementary material for: Comprehensive Genomic Profiling of Neuroendocrine Carcinomas of the Gastrointestinal System
Source: PubMed Central journal article supplement — Cancer Discov. 2022 Mar 8;12(3):692–711. doi: 10.1158/2159-8290.CD-21-0669 (PMC9394397; doi:10.1158/2159-8290.cd-21-0669), 2022-03-08
Supplement: cd-21-0669_supps12.pdf [file cd-21-0669_supps12.pdf]

# Supplementary Figure S12. LINE1-MET chimeric transcripts in GIS-NENs.

A

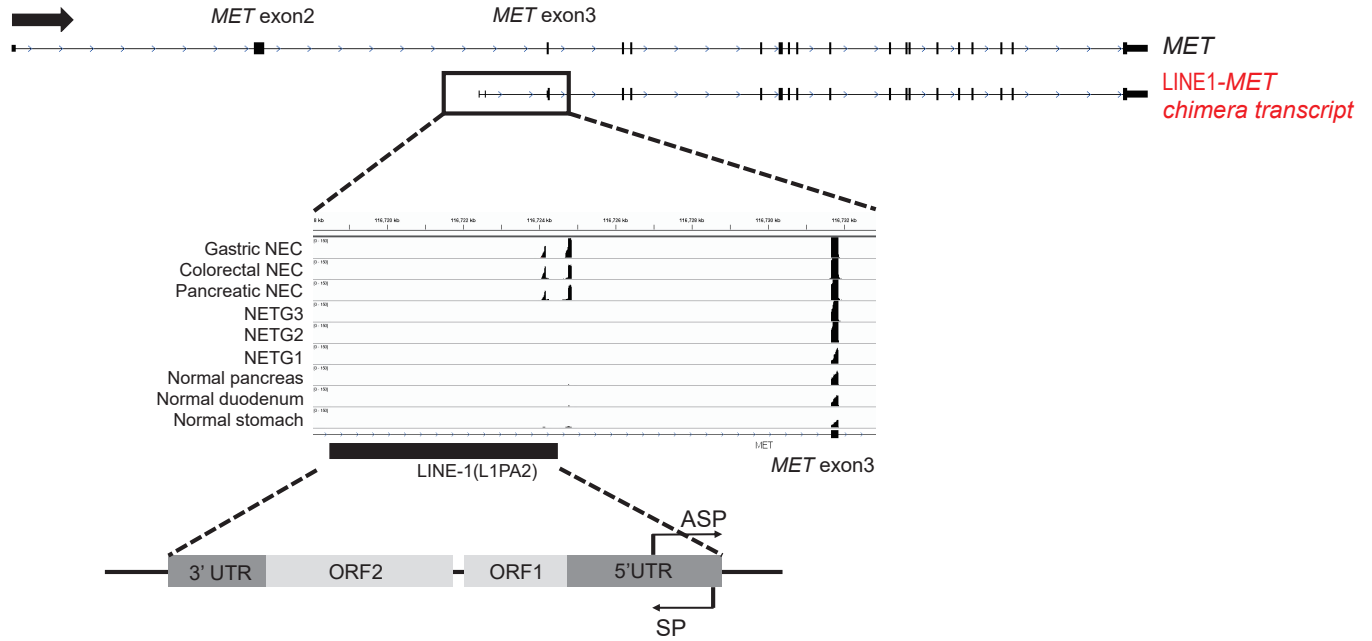

B

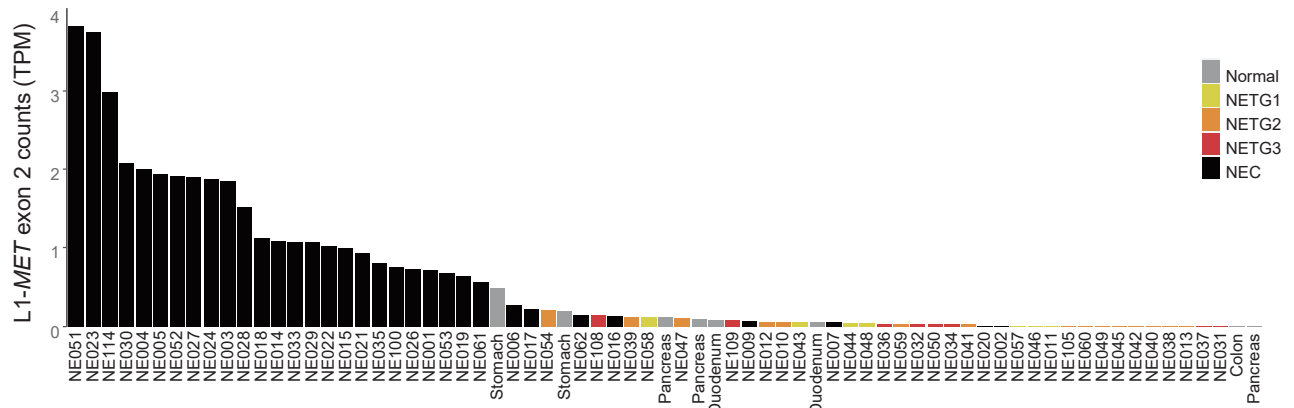

C

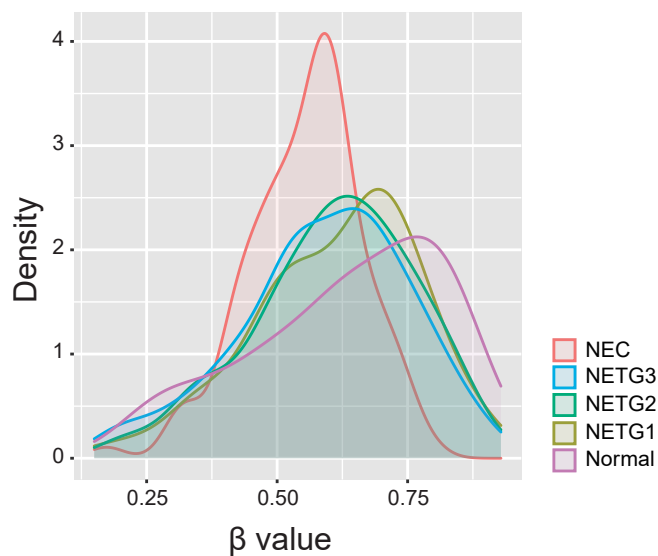

**A**, Integrative Genomic Viewer (IGV) visualized RNA-seq data for the intron 2 locus of *MET* in representative GIS-NEC/NET/normal tissues. LINE1-*MET* transcription starts from 5' UTR inside of LINE1 (L1PA2) in only NEC samples and is controlled by the LINE1 antisense promoter (ASP). **B**, Box plot showing read counts (TPM, Transcripts Per Kilobase Million) for LINE1 (L1)-*MET* exon2 in GIS-NEC/NET/normal tissues. With a two-fold higher TPM of the average value of all normal tissues as a threshold, most GIS-NECs (74.3%, 26/35) featured LINE1-*MET* chimeric transcripts, not observed in GIS-NETs (0%, 0/30). **C**, Density plot of 111 probes with large fluctuations of  $\beta$  values (standard deviation > 0.18) within the genome-wide LINE-1 locus among GIS-NENs shows differences in methylation status, particularly in GIS-NECs (GIS-NECs versus GIS-NETG3s,  $P = 7.31 \times 10^{-45}$ ; GIS-NECs versus GIS-NETG2s,  $P = 5.75 \times 10^{-40}$ ; GIS-NECs versus GIS-NETG1s,  $P = 3.67 \times 10^{-42}$ ; GIS-NECs versus normal tissues,  $P = 2.35 \times 10^{-148}$ ). These findings suggest demethylation of LINE-1 antisense promoter could induce LINE1-*MET*, as previously reported (12).
