# Supplementary material for: Comprehensive Genomic Profiling of Neuroendocrine Carcinomas of the Gastrointestinal System
Source: PubMed Central journal article supplement — Cancer Discov. 2022 Mar 8;12(3):692–711. doi: 10.1158/2159-8290.CD-21-0669 (PMC9394397; doi:10.1158/2159-8290.cd-21-0669), 2022-03-08
Supplement: cd-21-0669_supps13.pdf [file cd-21-0669_supps13.pdf]

# Supplementary Figure S13. Novel Germline *ATG2A-MEN1* fusion transcript.

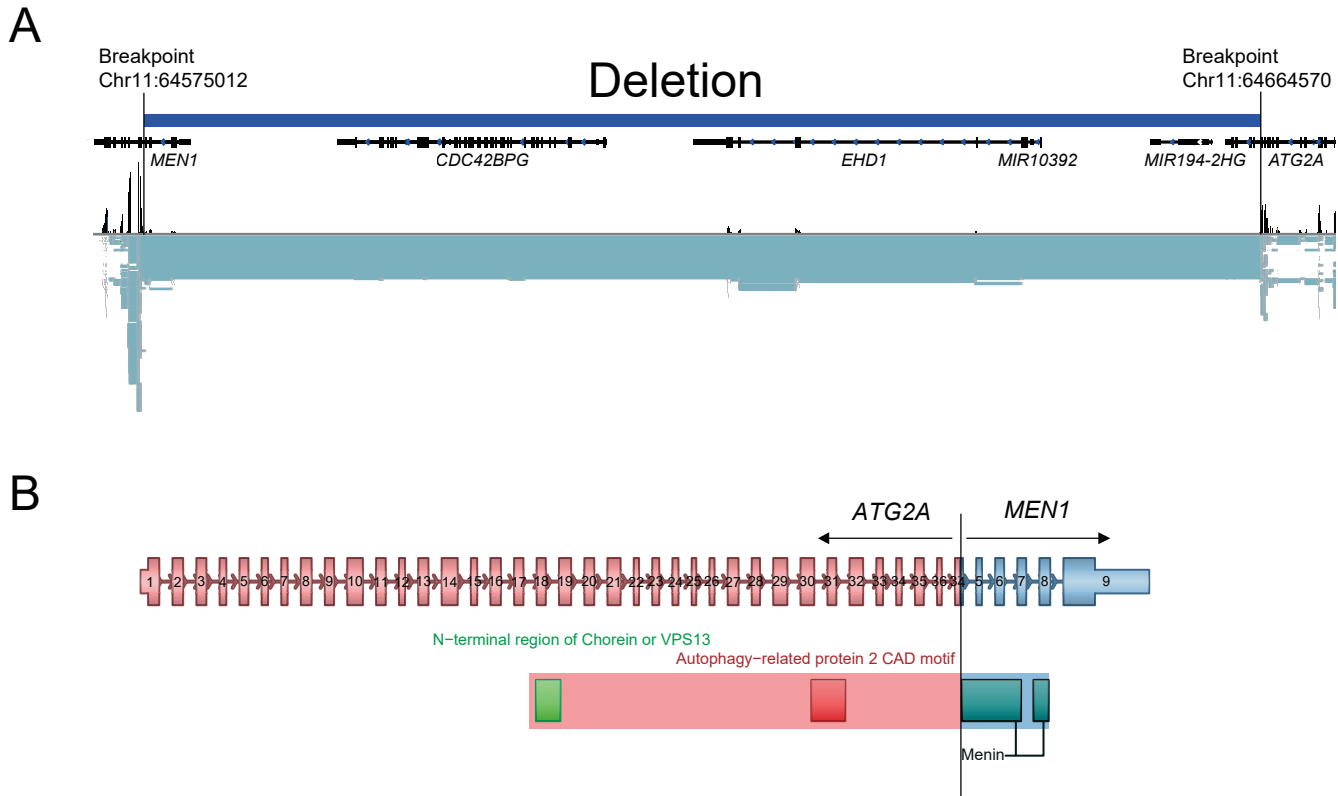

**A**, In Case NE042 (23-year-old female), deletion of chromosome 11 was detected by WGS using DNA obtained from normal pancreatic tissue, with breakpoints located in Chr11:64575012 (in *MEN1* exon4) and Chr11:64664570 (in *ATG2A* exon37). Alignment of RNA-seq reads for the reference sequences implicated a *ATG2A-MEN1* fusion gene in IGV. The structure is an out of frame fusion.

**B**, Visualization of the *ATG2A-MEN1* fusion transcript and conserved protein domains in the fusion protein generated by Arriba.
