# Supplementary material for: Comprehensive Genomic Profiling of Neuroendocrine Carcinomas of the Gastrointestinal System
Source: PubMed Central journal article supplement — Cancer Discov. 2022 Mar 8;12(3):692–711. doi: 10.1158/2159-8290.CD-21-0669 (PMC9394397; doi:10.1158/2159-8290.cd-21-0669), 2022-03-08
Supplement: cd-21-0669_supps15.pdf [file cd-21-0669_supps15.pdf]

# Supplementary Figure S15. DNA methylation status in Panc-NETs.

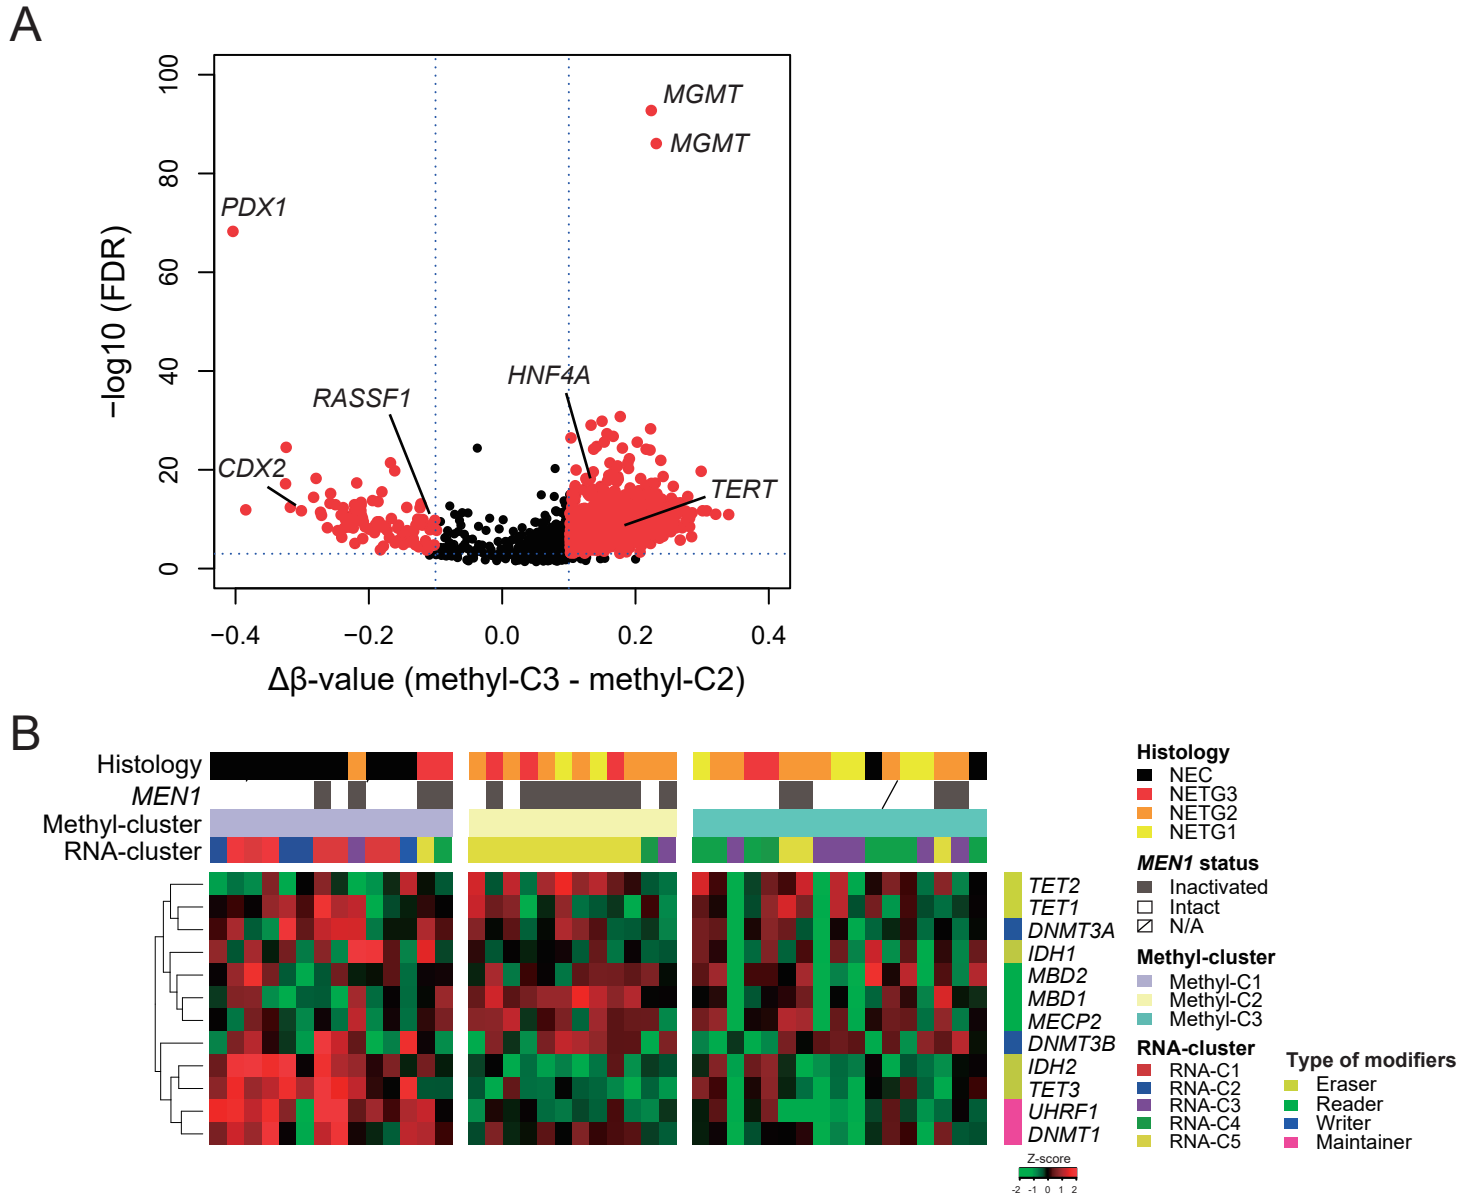

**A**, Volcano plot showing the differential methylation status of DMRs between the two clusters (Methyl-C2 and Methyl-C3) in Fig. 2C. Methyl-C2 shows hypermethylation of *PDX1*, *CDX2*, and *RASSF1* and hypomethylation of *HNF4A* and 18 genes listed in COSMIC Cancer Gene Census (e.g., *MGMT*, *TERT*), compared to Methyl-C3. The horizontal dot line corresponds to a FDR *P*-value of 0.05.

**B**, Gene expression of DNA methylation modifiers based on RNA-seq. The histology (NET/NEC), the status of *MEN1*, and clusters based on RNA-seq are indicated at the top. In the Methyl-C1 group mostly consisting of NECs, the expression of *IDH2* (versus Methyl-C2,  $P = 8.00 \times 10^{-5}$ ; versus Methyl-C3,  $P = 6.47 \times 10^{-5}$ ), *TET3* (versus Methyl-C2,  $P = 5.16 \times 10^{-5}$ ; versus Methyl-C3,  $P = 4.85 \times 10^{-4}$ ), *UHRF1* (versus Methyl-C2,  $P = 5.06 \times 10^{-4}$ ; versus Methyl-C3,  $P = 8.75 \times 10^{-5}$ ), and *DNMT1* (versus Methyl-C3,  $P = 0.00137$ ) are significantly higher, compared to Methyl-C2 and/or C3. In the Methyl-C2 where most cases have alterations of *MEN1*, the expression of *TET2* (versus Methyl-C1,  $P = 0.0333$ ) and *MBD1* (versus Methyl-C1,  $P = 0.00309$ ; versus Methyl-C3,  $P = 0.00179$ ) are significantly higher, compared to Methyl-C1 and/or C3.
