# Supplementary material for: Comprehensive Genomic Profiling of Neuroendocrine Carcinomas of the Gastrointestinal System
Source: PubMed Central journal article supplement — Cancer Discov. 2022 Mar 8;12(3):692–711. doi: 10.1158/2159-8290.CD-21-0669 (PMC9394397; doi:10.1158/2159-8290.cd-21-0669), 2022-03-08
Supplement: cd-21-0669_supps16.pdf [file cd-21-0669_supps16.pdf]

## Supplementary Figure S16. Motif enrichment analysis of characteristic transcription factors based on ATAC-seq.

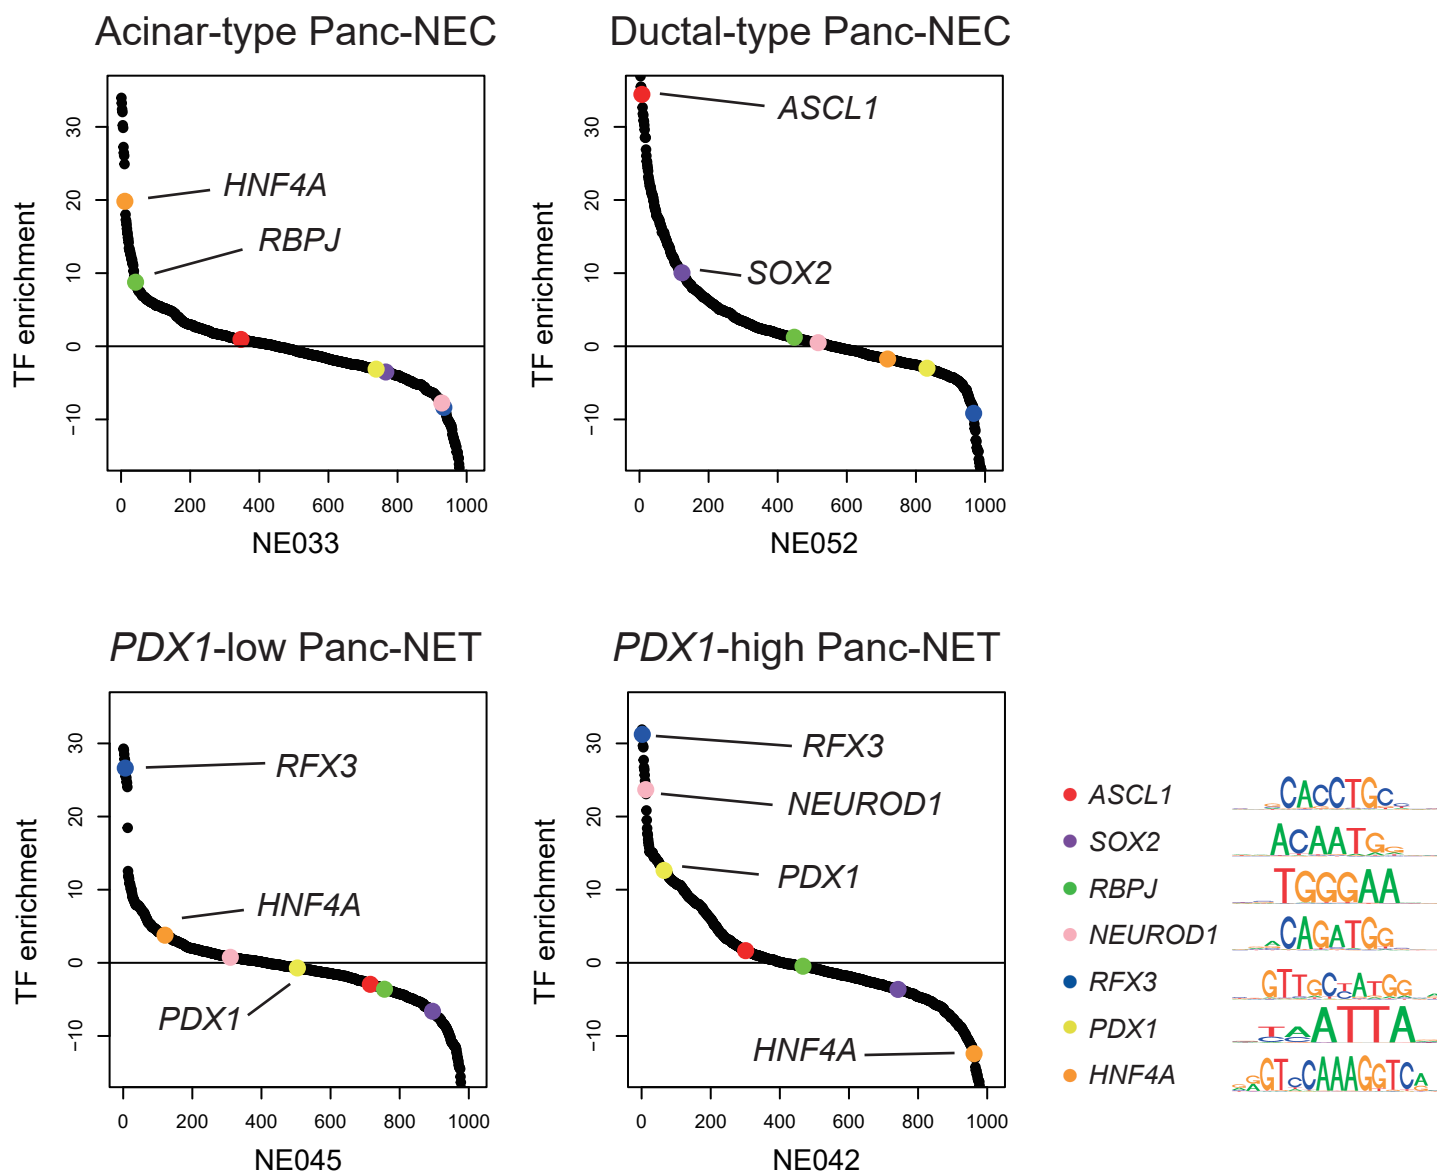

Representative cases showing motif enrichment of transcription factors (TFs) for each group in Fig. 2D. The Y axis (TF enrichment) indicates change in deviation scores relative to the expected accessibility signal at ATAC-seq peaks containing known transcription factor motifs. The X axis indicates rank-sorted change in deviation. Transcription factor deviation scores were calculated as previously described (14,15), (81). In an 'Acinar-type Panc-NEC (NE033)', *RBPJ* (*PTF1A*) and *HNF4A* are characteristically enriched. It is known that *PTF1* exclusively features the *RBPJ* isoform in acinar cells (16). In a 'Ductal-type Panc-NEC', *ASCL1* and *SOX2* are enriched. In Case NE045 (Methyl-C2 in Fig. 2C), motif enrichment of *RFX3* and *HNF4A*, which are required for the differentiation of mature beta-cell from endocrine progenitors in the pancreas (17), is high while that of *PDX1*, which is expressed in exocrine and endocrine pancreatic precursors, is low. In Case NE042 (Methyl-C3 in Fig. 2C), the motif enrichment of *RFX3*, *NEUROD1*, and *PDX1* is high and of *HNF4A* is low.
